# Supplementary material
Source: Springer Nature journal article supplement (https://www.springermedizin.de/resource/supplementary/12890_2013_477_MOESM5_ESM.pdf/9505552)

## Figures

Figure 1:

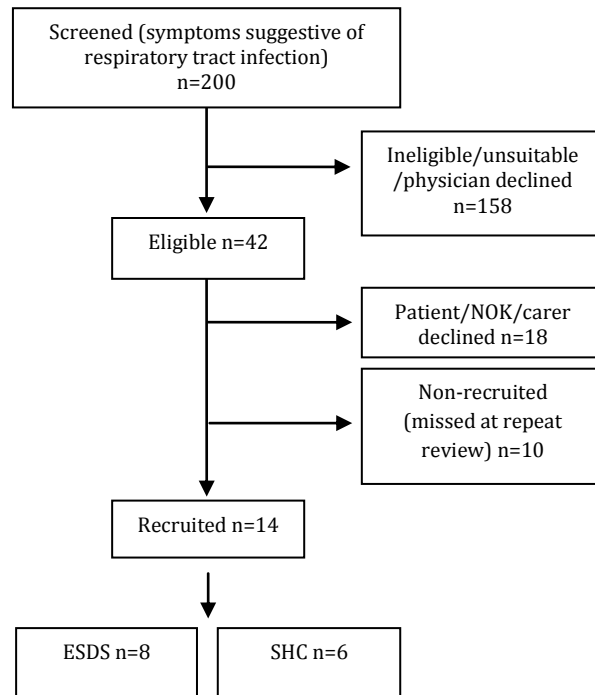

Supplement: MOESM5 [file 9505552]
